# Supplementary material
Source: PubMed Central journal article supplement (PMC3754582)
Supplement: JB.00456-13_zjb999092738so1.pdf [file JB.00456-13_zjb999092738so1.pdf]

## Supplemental Material

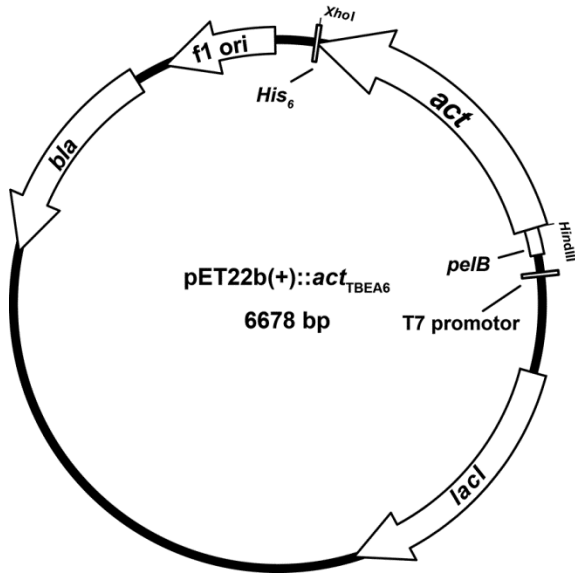

Supplemental Fig. S1

Physical map of pET22b(+)::act<sub>TBEA6</sub>. *Act*, succinyl-CoA:3-sulfino-propionate CoA-transferase from *V. paradoxus* strain TBEA6; *bla*, β-lactamase; *pelB*, pelB signal sequence for potential periplasmic localization; f1 ori, f1 origin of replication.

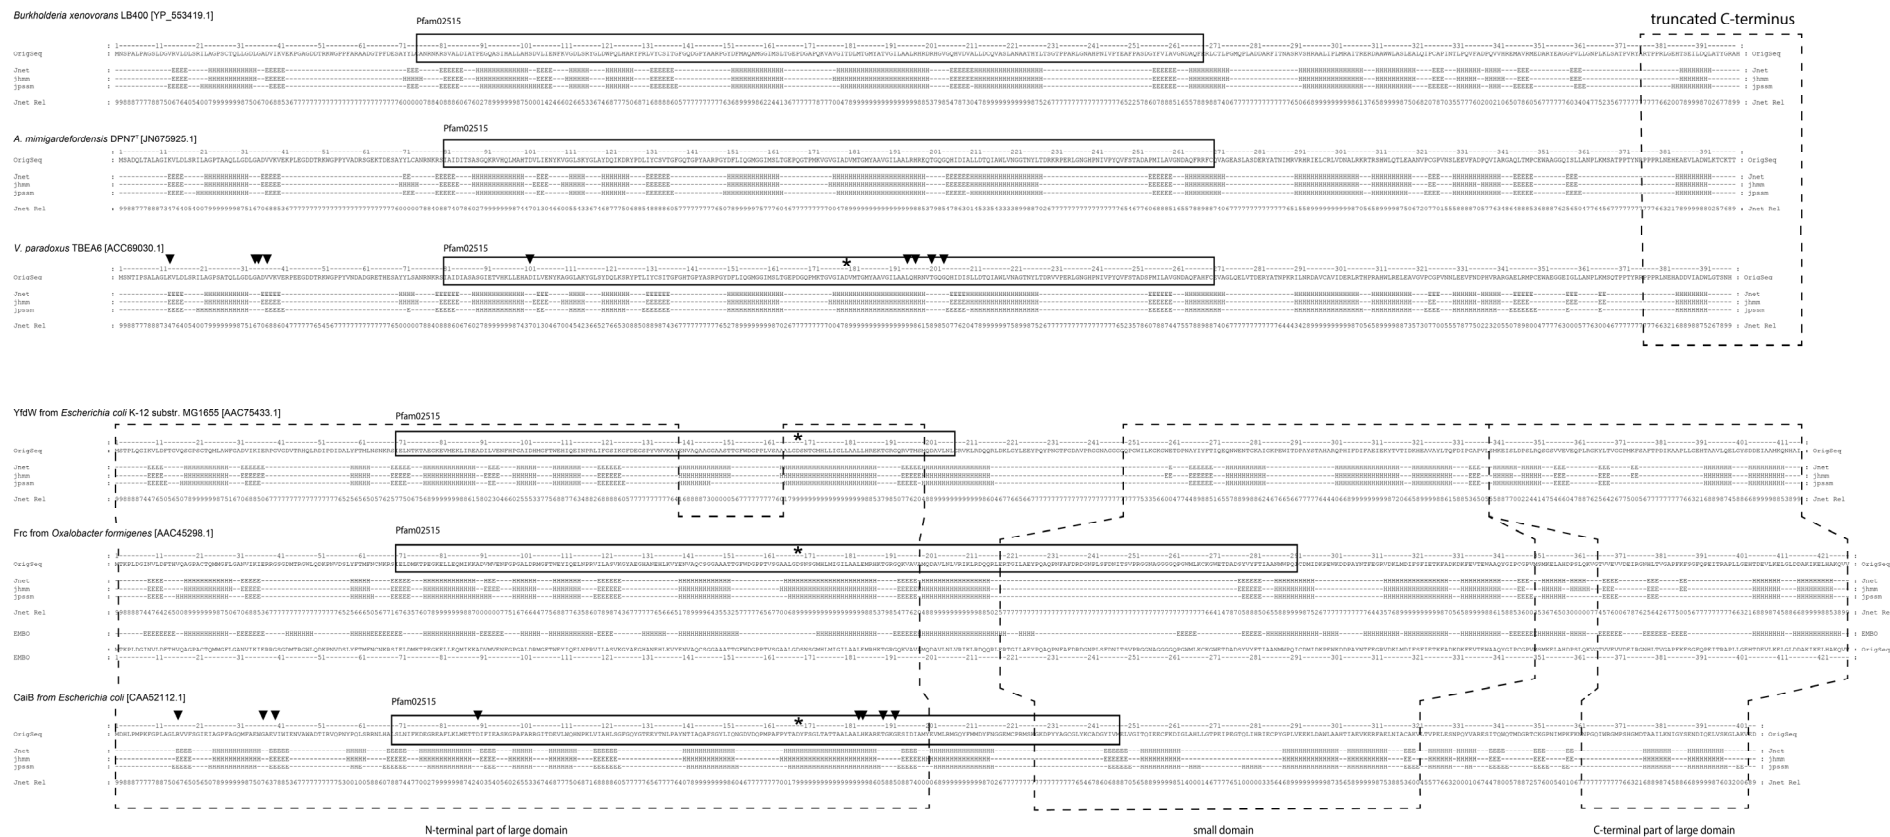

Supplemental Fig. S2

Secondary structure prediction of ACTBEA6-orthologues. Amino acid sequences were subjected to secondary structure prediction using the Jpred3 server (44). Due to their available solved crystal structures, formyl-CoA:oxalate CoA-transferase from *E. coli* (YfdW) (27, 28), its orthologue Frc from *O. formigenes* (20, 26) and crotonobetainyl-CoA:carnitine CoA transferase from *E. coli* (CaiB) (29, 30) as members of the CoA-transferase III family were included for comparison. For them, the N-terminal and C-terminal part of the large domain as well as the small domain are indicated

(dashed outline). For each sequence amino acids annotated as Pfam02515 (CoA-transferase family III) are contoured with a solid line. The truncated C-terminus found in Act<sub>TBEA6</sub> is highlighted by an additional box. Jnet, final secondary structure prediction for the amino acid query sequence; H,  $\alpha$ -helix; E, extended  $\beta$ -sheet; jhmm, Jnet hmm (hidden Markov model) profile prediction; jpssm; Jnet PSIBLAST pssm (position specific scoringmatrix) profile prediction. JnetRel, Jnet reliability of prediction accuracy. The latter ranges from 0 to 9 and higher values are better.

Supplemental Fig. S3

| Organism                          | Accession    | Gene                 | Start        | End | Score |  |
|-----------------------------------|--------------|----------------------|--------------|-----|-------|--|
| <i>Chloroflexus aurantiacus</i>   | J-10-f1      | (YP_001633818.1)     | 1            | 58  |       |  |
| <i>Burkholderia xenovorans</i>    | LB400        | (YP_559695.1)        | 1            | 58  |       |  |
| <i>A. mimigardefordensis</i>      | DPN7         | (JN675925.1)         | 1            | 58  |       |  |
| <i>V. paradoxus</i>               | TBEA6        | (ACC69030.2)         | 1            | 58  |       |  |
| <i>V. paradoxus</i>               | EPS          | (YP_004152464.1)     | 1            | 58  |       |  |
| <i>V. paradoxus</i>               | S110         | (YP_002942048.1)     | 1            | 58  |       |  |
| <i>V. paradoxus</i>               | B4           | (contig47_RVVP05211) | 1            | 58  |       |  |
| <i>Verminephrobacter eiseniae</i> | EF01-2       | (YP_996507.1)        | 1            | 58  |       |  |
| <i>Pseudomonas putida</i>         | KT2240       | (NE_742328.1)        | 1            | 58  |       |  |
| <i>Burkholderia xenovorans</i>    | LB400        | (YP_553419.1)        | 1            | 58  |       |  |
| <i>Ralstonia eutropha</i>         | H16          | (YP_727217.1)        | 1            | 58  |       |  |
| <i>Chloroflexus aurantiacus</i>   | J-10-f1      | (BY35475.1)          | 1            | 58  |       |  |
| <i>E. coli</i>                    | K-12 substr. | MG1655               | (AAC75433.1) | 1   | 58    |  |
| <i>Oxalobacter formigenes</i>     | (AAC45298.1) | 1                    | 58           |     |       |  |
| <i>Escherichia coli</i>           | (CA52112.1)  | 1                    | 58           |     |       |  |
| <i>Chlostridium scindens</i>      | (AAC45415.1) | 1                    | 58           |     |       |  |
| <i>Chloroflexus aurantiacus</i>   | J-10-f1      | (YP_001633818.1)     | 52           | 131 |       |  |
| <i>Burkholderia xenovorans</i>    | LB400        | (YP_559695.1)        | 52           | 131 |       |  |
| <i>A. mimigardefordensis</i>      | DPN7         | (JN675925.1)         | 56           | 131 |       |  |
| <i>V. paradoxus</i>               | TBEA6        | (ACC69030.2)         | 56           | 131 |       |  |
| <i>V. paradoxus</i>               | EPS          | (YP_004152464.1)     | 54           | 131 |       |  |
| <i>V. paradoxus</i>               | S110         | (YP_002942048.1)     | 56           | 131 |       |  |
| <i>V. paradoxus</i>               | B4           | (contig47_RVVP05211) | 55           | 131 |       |  |
| <i>Verminephrobacter eiseniae</i> | EF01-2       | (YP_996507.1)        | 91           | 131 |       |  |
| <i>Pseudomonas putida</i>         | KT2240       | (NE_742328.1)        | 51           | 131 |       |  |
| <i>Burkholderia xenovorans</i>    | LB400        | (YP_553419.1)        | 58           | 131 |       |  |
| <i>Ralstonia eutropha</i>         | H16          | (YP_727217.1)        | 51           | 131 |       |  |
| <i>Chloroflexus aurantiacus</i>   | J-10-f1      | (BY35475.1)          | 57           | 131 |       |  |
| <i>E. coli</i>                    | K-12 substr. | MG1655               | (AAC75433.1) | 50  | 131   |  |
| <i>Oxalobacter formigenes</i>     | (AAC45298.1) | 57                   | 131          |     |       |  |
| <i>Escherichia coli</i>           | (CA52112.1)  | 57                   | 131          |     |       |  |
| <i>Chlostridium scindens</i>      | (AAC45415.1) | 58                   | 131          |     |       |  |
| <i>Chloroflexus aurantiacus</i>   | J-10-f1      | (YP_001633818.1)     | 131          | 217 |       |  |
| <i>Burkholderia xenovorans</i>    | LB400        | (YP_559695.1)        | 139          | 217 |       |  |
| <i>A. mimigardefordensis</i>      | DPN7         | (JN675925.1)         | 144          | 217 |       |  |
| <i>V. paradoxus</i>               | TBEA6        | (ACC69030.1)         | 144          | 217 |       |  |
| <i>V. paradoxus</i>               | EPS          | (YP_004152464.1)     | 142          | 217 |       |  |
| <i>V. paradoxus</i>               | S110         | (YP_002942048.1)     | 144          | 217 |       |  |
| <i>V. paradoxus</i>               | B4           | (contig47_RVVP05211) | 143          | 217 |       |  |
| <i>Verminephrobacter eiseniae</i> | EF01-2       | (YP_996507.1)        | 179          | 217 |       |  |
| <i>Pseudomonas putida</i>         | KT2240       | (NE_742328.1)        | 139          | 217 |       |  |
| <i>Burkholderia xenovorans</i>    | LB400        | (YP_553419.1)        | 146          | 217 |       |  |
| <i>Ralstonia eutropha</i>         | H16          | (YP_727217.1)        | 139          | 217 |       |  |
| <i>Chloroflexus aurantiacus</i>   | J-10-f1      | (BY35475.1)          | 138          | 217 |       |  |
| <i>E. coli</i>                    | K-12 substr. | MG1655               | (AAC75433.1) | 133 | 217   |  |
| <i>Oxalobacter formigenes</i>     | (AAC45298.1) | 133                  | 217          |     |       |  |
| <i>Escherichia coli</i>           | (CA52112.1)  | 134                  | 217          |     |       |  |
| <i>Chlostridium scindens</i>      | (AAC45415.1) | 134                  | 217          |     |       |  |
| <i>Chloroflexus aurantiacus</i>   | J-10-f1      | (YP_001633818.1)     | 215          | 272 |       |  |
| <i>Burkholderia xenovorans</i>    | LB400        | (YP_559695.1)        | 229          | 272 |       |  |
| <i>A. mimigardefordensis</i>      | DPN7         | (JN675925.1)         | 230          | 272 |       |  |
| <i>V. paradoxus</i>               | TBEA6        | (ACC69030.2)         | 230          | 272 |       |  |
| <i>V. paradoxus</i>               | EPS          | (YP_004152464.1)     | 232          | 272 |       |  |
| <i>V. paradoxus</i>               | S110         | (YP_002942048.1)     | 234          | 272 |       |  |
| <i>V. paradoxus</i>               | B4           | (contig47_RVVP05211) | 233          | 272 |       |  |
| <i>Verminephrobacter eiseniae</i> | EF01-2       | (YP_996507.1)        | 269          | 272 |       |  |
| <i>Pseudomonas putida</i>         | KT2240       | (NE_742328.1)        | 229          | 272 |       |  |
| <i>Burkholderia xenovorans</i>    | LB400        | (YP_553419.1)        | 232          | 272 |       |  |
| <i>Ralstonia eutropha</i>         | H16          | (YP_727217.1)        | 229          | 272 |       |  |
| <i>Chloroflexus aurantiacus</i>   | J-10-f1      | (BY35475.1)          | 224          | 272 |       |  |
| <i>E. coli</i>                    | K-12 substr. | MG1655               | (AAC75433.1) | 219 | 272   |  |
| <i>Oxalobacter formigenes</i>     | (AAC45298.1) | 219                  | 272          |     |       |  |
| <i>Escherichia coli</i>           | (CA52112.1)  | 218                  | 272          |     |       |  |
| <i>Chlostridium scindens</i>      | (AAC45415.1) | 218                  | 272          |     |       |  |
| <i>Chloroflexus aurantiacus</i>   | J-10-f1      | (YP_001633818.1)     | 273          | 360 |       |  |
| <i>Burkholderia xenovorans</i>    | LB400        | (YP_559695.1)        | 282          | 360 |       |  |
| <i>A. mimigardefordensis</i>      | DPN7         | (JN675925.1)         | 283          | 360 |       |  |
| <i>V. paradoxus</i>               | TBEA6        | (ACC69030.2)         | 283          | 360 |       |  |
| <i>V. paradoxus</i>               | EPS          | (YP_004152464.1)     | 285          | 360 |       |  |
| <i>V. paradoxus</i>               | S110         | (YP_002942048.1)     | 287          | 360 |       |  |
| <i>V. paradoxus</i>               | B4           | (contig47_RVVP05211) | 286          | 360 |       |  |
| <i>Verminephrobacter eiseniae</i> | EF01-2       | (YP_996507.1)        | 322          | 360 |       |  |
| <i>Pseudomonas putida</i>         | KT2240       | (NE_742328.1)        | 282          | 360 |       |  |
| <i>Burkholderia xenovorans</i>    | LB400        | (YP_553419.1)        | 282          | 360 |       |  |
| <i>Ralstonia eutropha</i>         | H16          | (YP_727217.1)        | 282          | 360 |       |  |
| <i>Chloroflexus aurantiacus</i>   | J-10-f1      | (BY35475.1)          | 278          | 360 |       |  |
| <i>E. coli</i>                    | K-12 substr. | MG1655               | (AAC75433.1) | 294 | 360   |  |
| <i>Oxalobacter formigenes</i>     | (AAC45298.1) | 294                  | 360          |     |       |  |
| <i>Escherichia coli</i>           | (CA52112.1)  | 306                  | 360          |     |       |  |
| <i>Chlostridium scindens</i>      | (AAC45415.1) | 275                  | 360          |     |       |  |
| <i>Chloroflexus aurantiacus</i>   | J-10-f1      | (YP_001633818.1)     | 361          | 409 |       |  |
| <i>Burkholderia xenovorans</i>    | LB400        | (YP_559695.1)        | 365          | 409 |       |  |
| <i>A. mimigardefordensis</i>      | DPN7         | (JN675925.1)         | 368          | 409 |       |  |
| <i>V. paradoxus</i>               | TBEA6        | (ACC69030.2)         | 368          | 409 |       |  |
| <i>V. paradoxus</i>               | EPS          | (YP_004152464.1)     | 371          | 409 |       |  |
| <i>V. paradoxus</i>               | S110         | (YP_002942048.1)     | 373          | 409 |       |  |
| <i>V. paradoxus</i>               | B4           | (contig47_RVVP05211) | 372          | 409 |       |  |
| <i>Verminephrobacter eiseniae</i> | EF01-2       | (YP_996507.1)        | 408          | 409 |       |  |
| <i>Pseudomonas putida</i>         | KT2240       | (NE_742328.1)        | 365          | 409 |       |  |
| <i>Burkholderia xenovorans</i>    | LB400        | (YP_553419.1)        | 370          | 409 |       |  |
| <i>Ralstonia eutropha</i>         | H16          | (YP_727217.1)        | 370          | 409 |       |  |
| <i>Chloroflexus aurantiacus</i>   | J-10-f1      | (BY35475.1)          | 361          | 409 |       |  |
| <i>E. coli</i>                    | K-12 substr. | MG1655               | (AAC75433.1) | 361 | 409   |  |
| <i>Oxalobacter formigenes</i>     | (AAC45298.1) | 361                  | 409          |     |       |  |
| <i>Escherichia coli</i>           | (CA52112.1)  | 361                  | 409          |     |       |  |
| <i>Chlostridium scindens</i>      | (AAC45415.1) | 360                  | 409          |     |       |  |

### Supplemental Fig. S3

Multiple sequence alignment of Act<sub>TBEA6</sub> and orthologues from various related species.

Identical amino acids are shaded in dark-grey. Similar amino acids are shaded in light-grey.

Accession numbers are given in parentheses. Amino acid residues considered to be highly conserved throughout class III CoA-transferases (26) are indicated with a hash. Residues corresponding to Asp169, which represents the putative active site key residue in formyl-CoA-transferase (20), are highlighted with a frame. The glycine-rich loop of formyl-CoA transferases is highlighted as well.

Supplemental Table S1.

| oligonucleotide                                                                | sequence (5'-3') <sup>a</sup>         | Source or reference                |
|--------------------------------------------------------------------------------|---------------------------------------|------------------------------------|
| Primers for PCR:                                                               |                                       |                                    |
| <i>act_HindIII_For</i>                                                         | <u>AAGCTT</u> ATGAGCAACACCATTCTAGC    | MWG Biotech AG, Ebersberg, Germany |
| <i>act_XhoI_Rev_oS</i>                                                         | CTC <u>GAGGTGGTTG</u> AGGTTCCGAGC     | MWG Biotech AG, Ebersberg, Germany |
| <i>XbaI_upAct</i>                                                              | AATCTAGAGGATCGCAGTCTCTCGCGC           | MWG Biotech AG, Ebersberg, Germany |
| <i>NdeI_upAct</i>                                                              | AAA <u>CATATG</u> CAATCATCTCCAAAAGGCC | MWG Biotech AG, Ebersberg, Germany |
| <i>NdeI_downAct</i>                                                            | AAAACATATGTAGAAGGAATATCACCATG         | MWG Biotech AG, Ebersberg, Germany |
| <i>XbaI_downAct</i>                                                            | AAATCTAGACATCGACTTGTGGACCTTC          | MWG Biotech AG, Ebersberg, Germany |
| Primers for sequencing:                                                        |                                       |                                    |
| M13 <i>Forward</i>                                                             | GTAAAACGACGGCCAG                      | MWG Biotech AG, Ebersberg, Germany |
| M13 <i>Reverse</i>                                                             | CAGGAAACAGCTATGAC                     | MWG Biotech AG, Ebersberg, Germany |
| <i>act_oS_451_For</i>                                                          | CCTGGCTACGACTTCCTG                    | MWG Biotech AG, Ebersberg, Germany |
| <i>act_oS_451_Rev</i>                                                          | CAGGAAGTCGTAGCCAGG                    | MWG Biotech AG, Ebersberg, Germany |
| <i>act_oS_876_For</i>                                                          | CTTCGGATTGTGGCGTAGC                   | MWG Biotech AG, Ebersberg, Germany |
| <i>act_oS_876_Rev</i>                                                          | GCTACGCCACAAATCCGAAG                  | MWG Biotech AG, Ebersberg, Germany |
| Primers for screening of <i>V. paradoxus</i> TBEA6 $\Delta act_{TBEA6}$ mutant |                                       |                                    |
| <i>up_act_proof</i>                                                            | CGAAGTCGGGCGGCCGATAGC                 | MWG Biotech AG, Ebersberg, Germany |
| <i>down_act_proof</i>                                                          | GCGCTGGGCGTTGTAGGCGG                  | MWG Biotech AG, Ebersberg, Germany |
| <i>act_int_fwd</i>                                                             | GCAGATGTTGTCAAAGTCGAGCG               | MWG Biotech AG, Ebersberg, Germany |
| <i>act_int_rev</i>                                                             | CGAGAATCATCGGCGAGTCG                  | MWG Biotech AG, Ebersberg, Germany |
| Primers for genomewalking                                                      |                                       |                                    |
| ActWalk1                                                                       | CGTGACAAATCCAGCACTTTGAGGC             | MWG Biotech AG, Ebersberg, Germany |
| ActSeq1                                                                        | GAATGGTGTGCTCATCAATCATC               | MWG Biotech AG, Ebersberg, Germany |
| ActWalk2                                                                       | CTTTCGTGTTTCAAGCCAAAAAGCG             | MWG Biotech AG, Ebersberg, Germany |
| ActSeq2                                                                        | GAAATTGGCCGAAGAGCAATTC                | MWG Biotech AG, Ebersberg, Germany |
| ActSeq3rev                                                                     | GAATTGCTCTTCGGCCAATTC                 | MWG Biotech AG, Ebersberg, Germany |
| ActSeq4rev                                                                     | CAAAAGCCAAAGCTACCGCG                  | MWG Biotech AG, Ebersberg, Germany |
| ActSeq5rev                                                                     | CGTTATCCCTGTCTATACGCGGC               | MWG Biotech AG, Ebersberg, Germany |
| Act_Walk3                                                                      | GGTTTGCGGCTCATTGAAATCCC               | MWG Biotech AG, Ebersberg, Germany |
| ActSeq6                                                                        | GAATTTATCCCCTATAGGCAGCCG              | MWG Biotech AG, Ebersberg, Germany |
| ActWalk5                                                                       | GGAGAAGTACAGCTACGCCACGCC              | MWG Biotech AG, Ebersberg, Germany |
| Act_Seq7                                                                       | GATCGGGCACGATGCAACACC                 | MWG Biotech AG, Ebersberg, Germany |
